# Supplementary material for: Ultralong near-infrared persistent luminescence in a Cr 3+ -doped gallogermanate for multifunctional applications
Source: Royal Society of Chemistry journal article supplement (doi:10.1039/d4tc04187a), 2024-12-03
Supplement: d4tc04187a1.pdf [file d4tc04187a1.pdf]

## Supporting Information

### Ultralong near-infrared persistent luminescence in a Cr<sup>3+</sup>-doped gallogermanate for multifunctional applications

Fangyi Zhao,<sup>a</sup> Yuhe Shao,<sup>b</sup> Qinan Mao,<sup>a</sup> Yiwen Zhu,<sup>a</sup> Heyi Yang,<sup>a</sup> Yang Ding,<sup>a</sup> Quanlin Liu<sup>b\*</sup> and Jiasong Zhong<sup>a\*</sup>

<sup>a</sup>Center of Advanced Optoelectronic Materials, College of Materials and Environmental Engineering, Hangzhou Dianzi University, Hangzhou 310018, China. E-mail: [jiasongzhong@hdu.edu.cn](mailto:jiasongzhong@hdu.edu.cn).

<sup>b</sup>The Beijing Municipal Key Laboratory of New Energy Materials and Technologies, School of Materials Science and Engineering, University of Science and Technology Beijing, Beijing 100083, China. E-mail: [qlliu@ustb.edu.cn](mailto:qlliu@ustb.edu.cn).

**Table S1.** Main parameters of processing and refinement of MGGO:0.15Cr<sup>3+</sup> phosphor

| Phosphor                    | MGGO:0.15Cr <sup>3+</sup> |
|-----------------------------|---------------------------|
| Space Group                 | <i>P</i> -1               |
| Symmetry                    | Triclinic                 |
| <i>a</i> (Å)                | 8.8470(2)                 |
| <i>b</i> (Å)                | 9.8184(2)                 |
| <i>c</i> (Å)                | 10.2831(1)                |
| $\alpha$ (°)                | 63.803(2)                 |
| $\beta$ (°)                 | 84.754(2)                 |
| $\gamma$ (°)                | 65.363(1)                 |
| <i>V</i> (Å <sup>3</sup> )  | 723.81(3)                 |
| <i>R</i> <sub>p</sub> (%)   | 7.06                      |
| <i>R</i> <sub>wp</sub> (%)  | 9.36                      |
| <i>R</i> <sub>exp</sub> (%) | 5.35                      |
| $\chi^2$                    | 3.07                      |

**Table S2.** Refined atomic parameters of MGGO:0.15Cr<sup>3+</sup> phosphor

| Atom | Wyck. | Occ.  | x      | y      | z      |
|------|-------|-------|--------|--------|--------|
| Mg1  | 2i    | 0.206 | 0.8328 | 0.8516 | 0.4607 |
| Ga1  | 2i    | 0.794 | 0.8328 | 0.8516 | 0.4607 |
| Mg2  | 2i    | 0.188 | 0.1461 | 0.1612 | 0.0501 |
| Ga2  | 2i    | 0.812 | 0.1461 | 0.1612 | 0.0501 |
| Mg3  | 2i    | 0.601 | 0.9591 | 0.9392 | 0.6501 |
| Ga3  | 2i    | 0.399 | 0.9591 | 0.9392 | 0.6501 |
| Mg4  | 2i    | 0.923 | 0.9479 | 0.9313 | 0.1600 |
| Ga4  | 2i    | 0.077 | 0.9479 | 0.9313 | 0.1600 |
| Mg5  | 2i    | 1     | 0.6397 | 0.6381 | 0.5687 |
| Mg6  | 2i    | 1     | 0.6448 | 0.6164 | 0.0617 |
| Mg7  | 2i    | 0.1   | 0.7392 | 0.7483 | 0.2554 |
| Ga5  | 2i    | 0.9   | 0.7392 | 0.7483 | 0.2554 |
| Mg8  | 1d    | 0.466 | 0.5000 | 0.0000 | 0.0000 |
| Ga6  | 1d    | 0.534 | 0.5000 | 0.0000 | 0.0000 |
| Mg9  | 1g    | 0.37  | 0.0000 | 0.5000 | 0.5000 |
| Ga7  | 1g    | 0.63  | 0.0000 | 0.5000 | 0.5000 |
| Ga8  | 2i    | 0.54  | 0.7528 | 0.3570 | 0.4262 |
| Ge1  | 2i    | 0.46  | 0.7528 | 0.3570 | 0.4262 |
| Ga9  | 2i    | 0.4   | 0.7496 | 0.3529 | 0.9220 |
| Ge2  | 2i    | 0.6   | 0.7496 | 0.3529 | 0.9220 |
| Ga10 | 2i    | 0.46  | 0.6449 | 0.2510 | 0.2156 |
| Ge3  | 2i    | 0.54  | 0.6449 | 0.2510 | 0.2156 |
| Ga11 | 2i    | 0.55  | 0.6384 | 0.2481 | 0.7157 |
| Ge4  | 2i    | 0.45  | 0.6384 | 0.2481 | 0.7157 |
| Ga12 | 2i    | 0.82  | 0.9483 | 0.5670 | 0.8058 |
| Ge5  | 2i    | 0.18  | 0.9483 | 0.5670 | 0.8058 |
| Ga13 | 2i    | 0.78  | 0.5708 | 0.9400 | 0.6910 |
| Ge6  | 2i    | 0.22  | 0.5708 | 0.9400 | 0.6910 |
| O1   | 2i    | 1     | 0.6186 | 0.8780 | 0.3423 |
| O2   | 2i    | 1     | 0.6248 | 0.8631 | 0.8746 |

---

|     |    |   |         |        |         |
|-----|----|---|---------|--------|---------|
| O3  | 2i | 1 | 0.8327  | 0.0614 | 0.2854  |
| O4  | 2i | 1 | 0.8367  | 0.0540 | 0.7772  |
| O5  | 2i | 1 | 0.7206  | 0.9553 | 0.5574  |
| O6  | 2i | 1 | 0.7497  | 0.9380 | 0.0830  |
| O7  | 2i | 1 | -0.0835 | 0.1736 | 0.4528  |
| O8  | 2i | 1 | -0.0589 | 0.1831 | -0.0113 |
| O9  | 2i | 1 | 0.8690  | 0.6226 | 0.6177  |
| O10 | 2i | 1 | 0.8503  | 0.6318 | 0.1135  |
| O11 | 2i | 1 | 0.6727  | 0.3908 | 0.7537  |
| O12 | 2i | 1 | 0.6740  | 0.4278 | 0.2242  |
| O13 | 2i | 1 | -0.0468 | 0.7310 | 0.8259  |
| O14 | 2i | 1 | -0.0725 | 0.7357 | 0.3170  |
| O15 | 2i | 1 | 0.7851  | 0.4931 | -0.0988 |
| O16 | 2i | 1 | 0.7593  | 0.5258 | 0.4475  |
| O17 | 2i | 1 | 0.5893  | 0.3238 | 0.5368  |
| O18 | 2i | 1 | 0.5957  | 0.3115 | 0.0203  |
| O19 | 2i | 1 | 0.4782  | 0.2129 | 0.3201  |
| O20 | 2i | 1 | 0.5440  | 0.7904 | 0.1642  |

---

**Table S3.** Refined octahedral bond lengths ( $d_{1,2}$ ), average octahedral bond lengths ( $d_{ave}$ ), octahedral volumes ( $V$ ), bond length distortion index ( $D$ ), and bond angle variance ( $\sigma^2$ ) of MGGO:0.15Cr<sup>3+</sup> phosphor

| Atom 1  | Atom 2 | Count | $d_{1,2}$ (Å) | $d_{ave}$ (Å) | $V$ (Å <sup>3</sup> ) | $D$     | $\sigma^2$ (deg. <sup>2</sup> ) |
|---------|--------|-------|---------------|---------------|-----------------------|---------|---------------------------------|
| Ga1 Mg1 | O5     | 1x    | 1.6972        | 2.0779        | 11.5741               | 0.07545 | 56.9177                         |
|         | O9     | 1x    | 2.0136        |               |                       |         |                                 |
|         | O3     | 1x    | 2.0527        |               |                       |         |                                 |
|         | O14    | 1x    | 2.1548        |               |                       |         |                                 |
|         | O1     | 1x    | 2.2078        |               |                       |         |                                 |
|         | O7     | 1x    | 2.3414        |               |                       |         |                                 |
| Ga2 Mg2 | O8     | 1x    | 1.8703        | 1.9851        | 10.2993               | 0.03127 | 28.1303                         |
|         | O13    | 1x    | 1.9318        |               |                       |         |                                 |
|         | O6     | 1x    | 1.9670        |               |                       |         |                                 |
|         | O10    | 1x    | 1.9961        |               |                       |         |                                 |
|         | O4     | 1x    | 2.0273        |               |                       |         |                                 |
|         | O2     | 1x    | 2.1181        |               |                       |         |                                 |
| Ga3 Mg3 | O7     | 1x    | 1.8338        | 2.0775        | 11.7715               | 0.05756 | 28.3441                         |
|         | O3     | 1x    | 2.0107        |               |                       |         |                                 |
|         | O4     | 1x    | 2.0430        |               |                       |         |                                 |
|         | O13    | 1x    | 2.0638        |               |                       |         |                                 |
|         | O7     | 1x    | 2.2019        |               |                       |         |                                 |
|         | O5     | 1x    | 2.3118        |               |                       |         |                                 |
| Ga4 Mg4 | O6     | 1x    | 1.9537        | 2.1123        | 11.9537               | 0.04980 | 111.9103                        |
|         | O14    | 1x    | 1.9558        |               |                       |         |                                 |
|         | O3     | 1x    | 2.1119        |               |                       |         |                                 |
|         | O4     | 1x    | 2.1466        |               |                       |         |                                 |
|         | O8     | 1x    | 2.2106        |               |                       |         |                                 |
|         | O8     | 1x    | 2.2954        |               |                       |         |                                 |
| Ga5 Mg7 | O14    | 1x    | 1.7729        | 1.9482        | 9.6585                | 0.07285 | 36.3881                         |
|         | O1     | 1x    | 1.8042        |               |                       |         |                                 |
|         | O20    | 1x    | 1.8416        |               |                       |         |                                 |
|         | O6     | 1x    | 1.9542        |               |                       |         |                                 |
|         | O16    | 1x    | 2.1529        |               |                       |         |                                 |
|         | O10    | 1x    | 2.1631        |               |                       |         |                                 |

---

|         |     |    |        |        |         |         |         |
|---------|-----|----|--------|--------|---------|---------|---------|
| Ga6 Mg8 | O20 | 2x | 1.9030 |        |         |         |         |
|         | O2  | 2x | 2.1732 | 2.0848 | 11.8096 | 0.05814 | 41.0373 |
|         | O6  | 2x | 2.1783 |        |         |         |         |
| Ga7 Mg9 | O9  | 2x | 2.0309 |        |         |         |         |
|         | O14 | 2x | 2.1089 | 2.0895 | 11.9655 | 0.01870 | 38.8997 |
|         | O16 | 2x | 2.1288 |        |         |         |         |
| Mg5     | O16 | 1x | 1.9713 |        |         |         |         |
|         | O9  | 1x | 2.0633 |        |         |         |         |
|         | O19 | 1x | 2.1267 |        |         |         |         |
|         | O17 | 1x | 2.1979 | 2.1709 | 13.3808 | 0.05395 | 35.4204 |
|         | O11 | 1x | 2.2429 |        |         |         |         |
|         | O1  | 1x | 2.4233 |        |         |         |         |
| Mg6     | O12 | 1x | 1.7992 |        |         |         |         |
|         | O10 | 1x | 2.0226 |        |         |         |         |
|         | O18 | 1x | 2.0698 |        |         |         |         |
|         | O20 | 1x | 2.2303 | 2.1370 | 12.5473 | 0.08103 | 74.4877 |
|         | O2  | 1x | 2.2780 |        |         |         |         |
|         | O15 | 1x | 2.4223 |        |         |         |         |

---

**Table S4.** Photoelectric performance of several NIR pc-LED devices fabricated with blue LED chips and Cr<sup>3+</sup>-doped phosphors.

| Phosphors                                                                                                 | NIR output power/photoelectric efficiency of pc-LED                                                                                    | Refs      |
|-----------------------------------------------------------------------------------------------------------|----------------------------------------------------------------------------------------------------------------------------------------|-----------|
| MGGO:Cr <sup>3+</sup>                                                                                     | 6.72 mW/6.55% at 20 mA, 33.34 mW/6.25% at 100 mA,<br>97.13 mW/5.01% at 350 mA, 107.57 mW/4.82% at 400 mA,<br>121.60 mW/4.30% at 500 mA | This work |
| Ca <sub>2</sub> LuZr <sub>2</sub> Al <sub>3</sub> O <sub>12</sub> :Cr <sup>3+</sup>                       | 2.448 mW/4.1% at 20 mA                                                                                                                 | 1         |
| Y <sub>3</sub> MgAl <sub>3</sub> SiO <sub>12</sub> :Cr <sup>3+</sup>                                      | 8.8 mW/3.16% at 100 mA                                                                                                                 | 2         |
| Na <sub>3</sub> Al <sub>2</sub> Li <sub>3</sub> F <sub>12</sub> :Cr <sup>3+</sup>                         | 36.84 mW/3.5% at 350 mA                                                                                                                | 3         |
| K <sub>3</sub> AlF <sub>6</sub> :Cr <sup>3+</sup>                                                         | 7 mW/~0.67% at 350 mA                                                                                                                  | 4         |
| K <sub>3</sub> GaF <sub>6</sub> :Cr <sup>3+</sup>                                                         | 8.4 mW/~0.8% at 350 mA                                                                                                                 | 4         |
| LiInP <sub>2</sub> O <sub>7</sub> :Cr <sup>3+</sup>                                                       | 6.24 mW/2.2% at 100 mA                                                                                                                 | 5         |
| NaInP <sub>2</sub> O <sub>7</sub> :Cr <sup>3+</sup>                                                       | 9.08 mW/2.98% at 100 mA                                                                                                                | 6         |
| NaScSi <sub>2</sub> O <sub>6</sub> :Cr <sup>3+</sup>                                                      | 26 mW/8.6% at 100 mA                                                                                                                   | 7         |
| ScBO <sub>3</sub> :Cr <sup>3+</sup>                                                                       | 26 mW/7% at 120 mA                                                                                                                     | 8         |
| Y <sub>0.57</sub> La <sub>0.72</sub> Sc <sub>2.71</sub> (BO <sub>3</sub> ) <sub>4</sub> :Cr <sup>3+</sup> | 10.69 mW/~3.71% at 100 mA, 17.61 mW/~1.81% at 300 mA                                                                                   | 9         |
| BaSnSi <sub>3</sub> O <sub>9</sub> :Cr <sup>3+</sup>                                                      | 12.19 mW/1.37% at 320 mA                                                                                                               | 10        |
| BaZrGe <sub>3</sub> O <sub>9</sub> :Cr <sup>3+</sup>                                                      | 6.45 mW/~0.6% at 320 mA                                                                                                                | 11        |
| Ga <sub>4</sub> GeO <sub>8</sub> :Cr <sup>3+</sup>                                                        | 55.94 mW/~3.75% at 400 mA                                                                                                              | 12        |

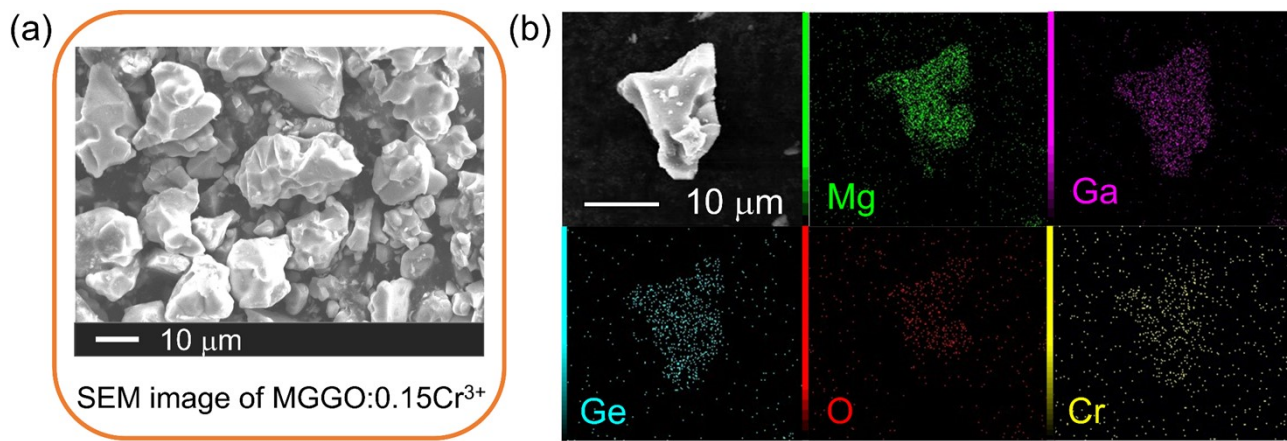

Fig. S1 (a) SEM and (b) element mapping images of MGGO:0.15Cr<sup>3+</sup>.



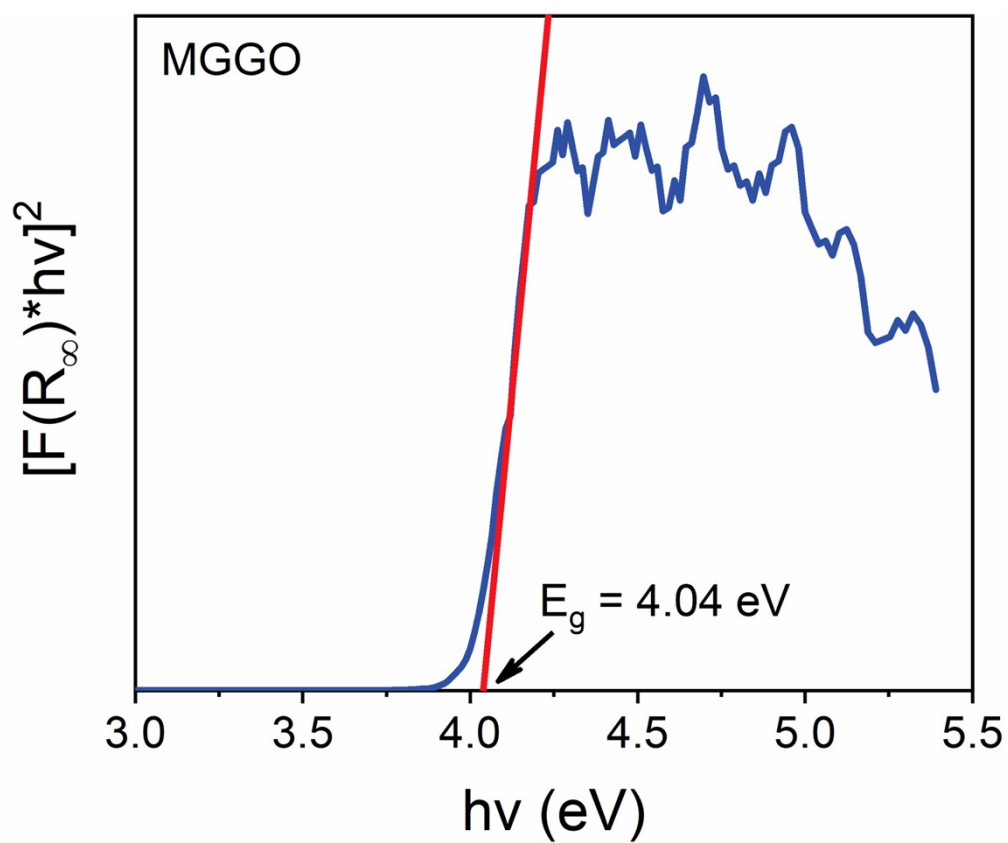

Fig. S2 DR spectrum of MGGO host with  $[F(R_\infty) \cdot hv]^2$  as a function of photon energy  $hv$ .

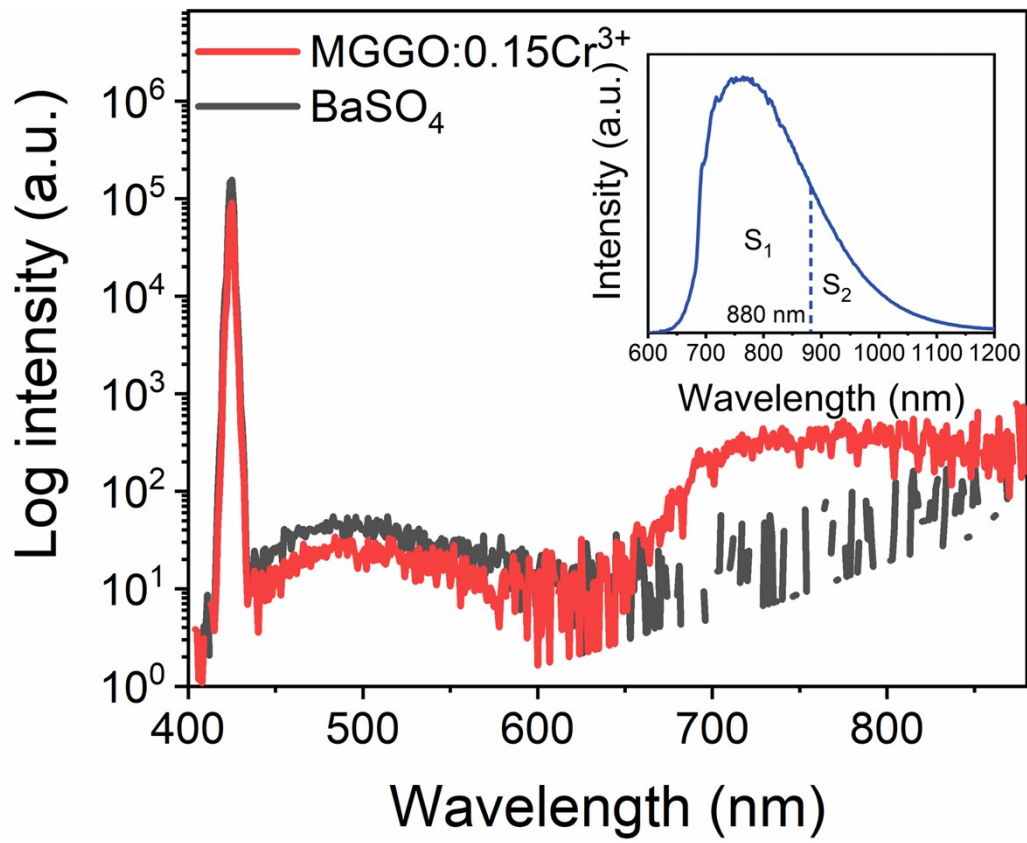

**Fig. S3** Spectra of MGGO:0.15Cr<sup>3+</sup> and BaSO<sub>4</sub> to determine the IQE/EQE values, and the inset shows the measured part S<sub>1</sub> (600-880 nm) and the missing part S<sub>2</sub> (880-1200 nm) of MGGO:0.15Cr<sup>3+</sup> during the IQE/EQE measurement.

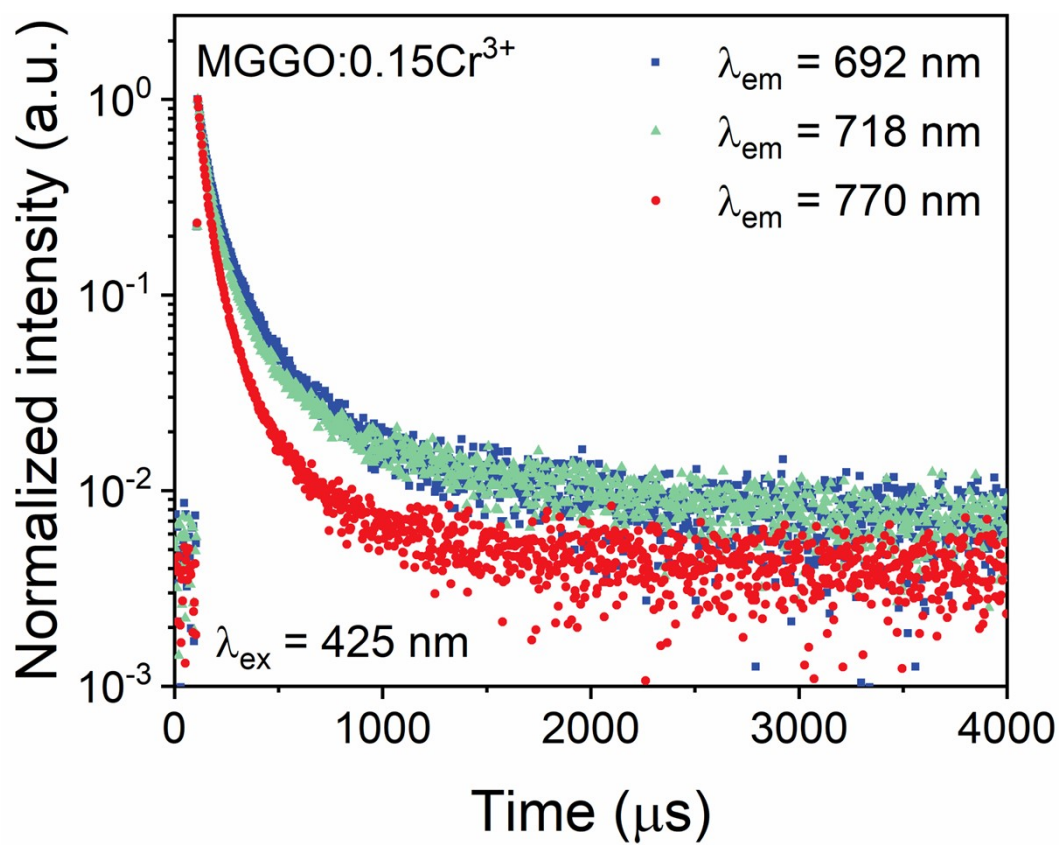

Fig. S4 Luminescence decay curves of MGGO:0.15Cr<sup>3+</sup> excited by 425 nm and monitoring at 692, 718 and 770 nm, respectively.

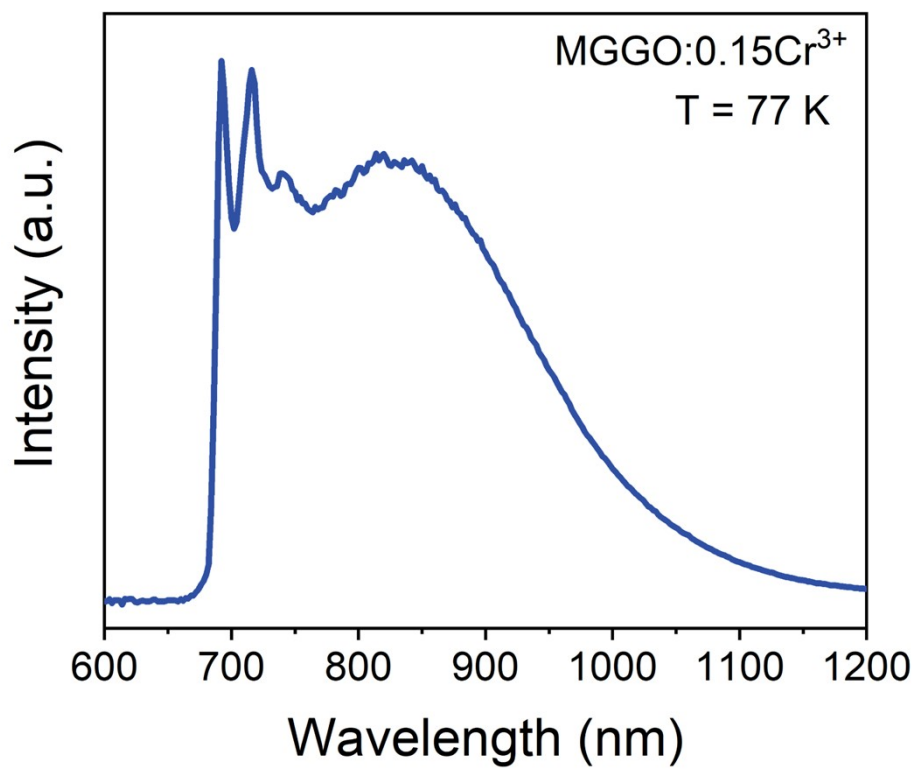

Fig. S5 PL spectrum of MGGO:0.15Cr<sup>3+</sup> measured at 77 K.

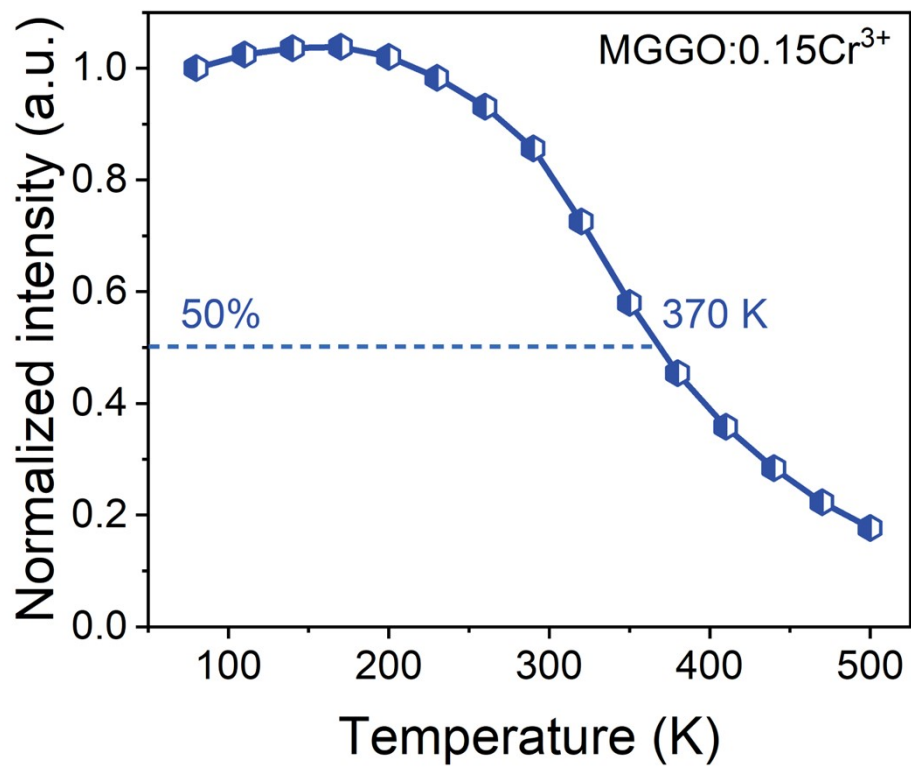

Fig. S6 Relationship between integrated emission intensity and temperature of MGGO:0.15Cr<sup>3+</sup>.

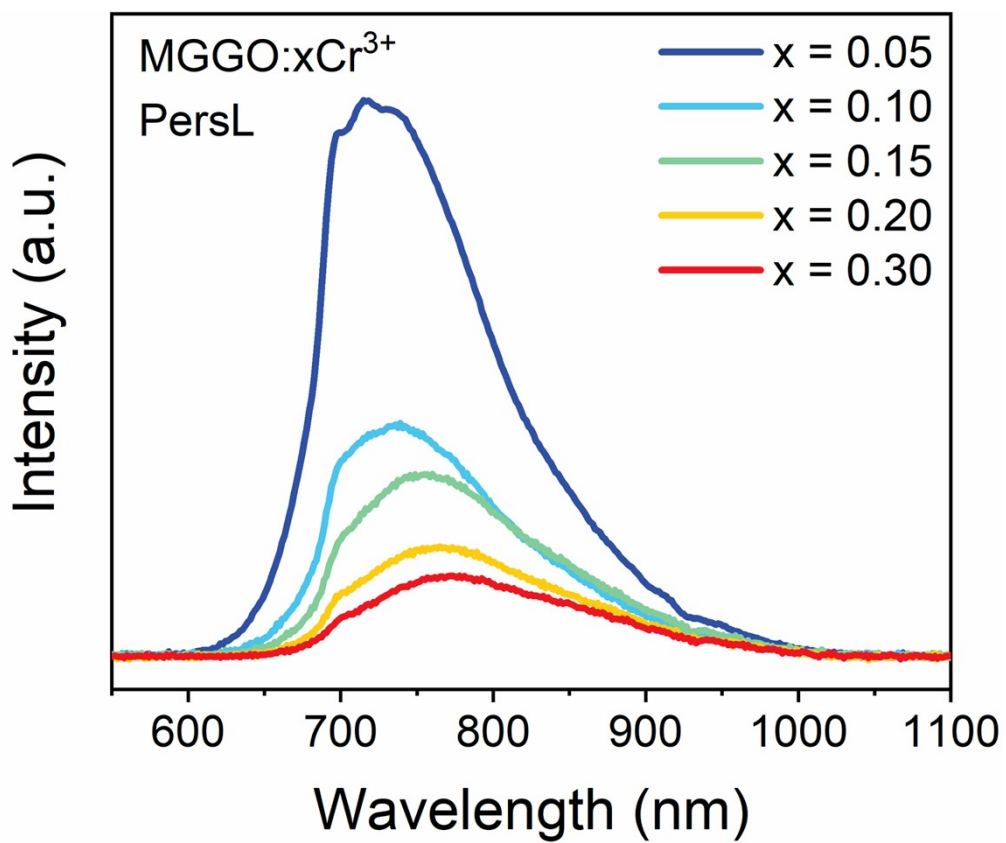

Fig. S7 PersL spectra of MGGO: $x\text{Cr}^{3+}$  ( $0.05 \leq x \leq 0.30$ ).

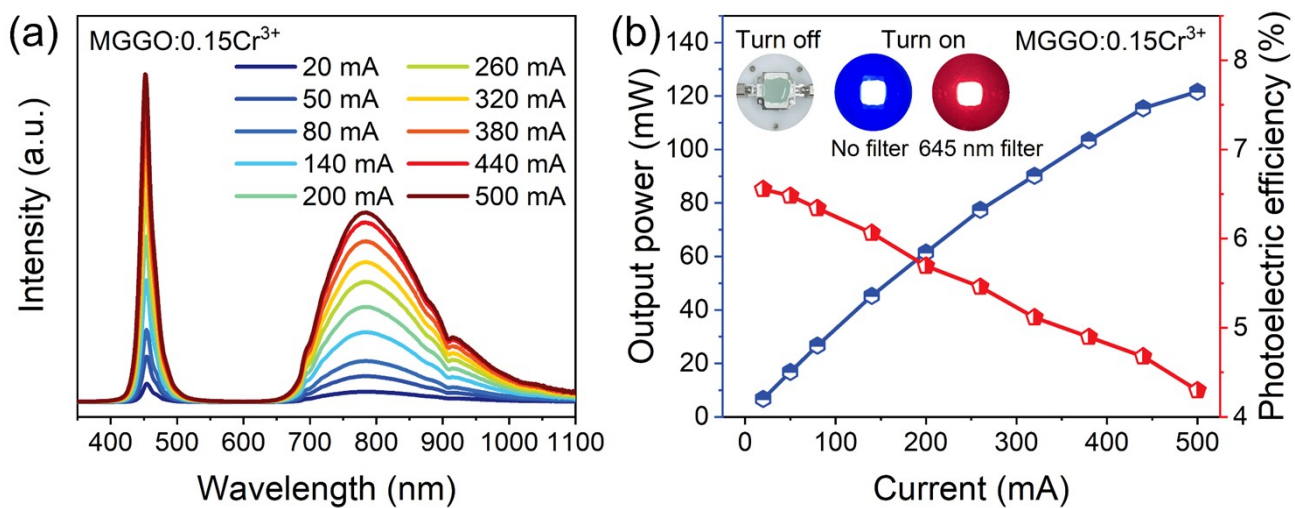

**Fig. S8** (a) EL spectra of the NIR pc-LED fabricated by coating MGGO:0.15Cr<sup>3+</sup> phosphor on a 450 nm blue LED chip at different driving currents (20-500 mA). (b) Output power and photoelectric efficiency as a function of the driving current of the NIR pc-LED, and the inset shows the photographs of this pc-LED with light on and off.

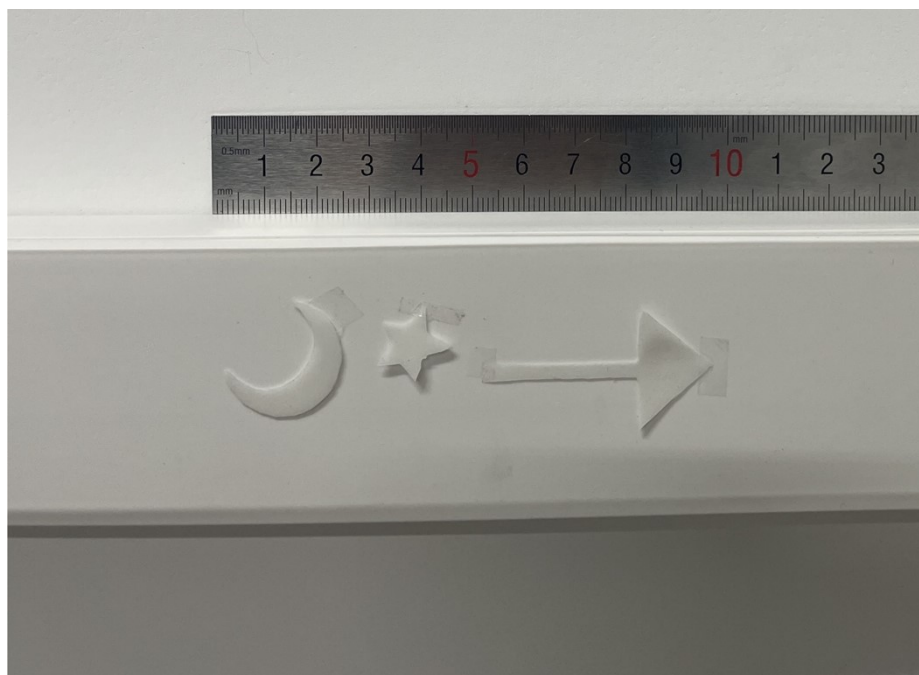

**Fig. S9** Photographs of moon, star and arrow films made of MGGO:0.05Cr<sup>3+</sup> and PDMS.



### Calculation method of the optical band gap of MGGO host:

The optical band gap value of the MGGO host can be calculated based on the Kubelka-Munk function and Tauc relation as follows,<sup>13-</sup>

15

$$[hv * F(R_{\infty})]^n = A(hv - E_g) \quad (S1)$$

$$F(R_{\infty}) = \frac{(1 - R_{\infty})^2}{2R_{\infty}} \quad (S2)$$

where  $F(R_{\infty})$  represents the Kubelka-Munk function,  $R_{\infty}$  is the reflectance of a layer that completely hides the substrate,  $h$  is the Planck's constant,  $\nu$  is the frequency of vibration,  $h\nu$  is the photon energy,  $A$  is a proportional constant and  $E_g$  is the value of optical band gap.

**Calculation method of the IQE/EQE values:**

Due to limitations of the instrument, only the IQE/EQE values in the emission wavelength range of 600-880 nm can be measured. The emission regions in 600-880 and 880-1200 nm are denoted as S1 and S2, respectively. The area of S1 occupies 76.28% of the entire emission range of 600-1200 nm, and the IQE/EQE values of S1 are measured to be 23.05%/9.45%. Therefore, the IQE/EQE values of  $\text{MGGO:0.15Cr}^{3+}$  in the wavelength range of 600-1200 nm are calculated to be 30.22%/12.39%.

**Calculation method of the crystal field strength  $Dq/B$ :**

The values of octahedral crystal field parameter  $Dq$ , Racah parameter  $B$  and crystal field strength  $Dq/B$  can be calculated based on the following Equations,<sup>16,17</sup>

$$10Dq = E(^4T_2) - E(^4A_2 \rightarrow ^4T_2) - \Delta S / 2 \quad (S3)$$

$$Dq / B = \frac{15(\Delta E / Dq - 8)}{(\Delta E / Dq)^2 - 10(\Delta E / Dq)} \quad (S4)$$

$$\Delta E = E(^4T_1) - E(^4T_2) \quad (S5)$$

where  $E(^4T_1)$  and  $E(^4T_2)$  can be determined from the excitation spectral peaks originating from  $^4A_2(^4F) \rightarrow ^4T_1(^4F)$  and  $^4A_2(^4F) \rightarrow ^4T_2(^4F)$  transitions.  $\Delta R$  is the Stokes shift.

**Calculation method of the trap depth:**

The trap depth can be calculated based on the following Equation,<sup>18</sup>

$$E = (-0.94 \ln \beta + 30.09)kT_m \quad (S6)$$

where  $E$  is the trap depth (eV),  $\beta$  is the heating rate (K/s),  $k$  is the Boltzmann's constant with a value of  $8.617 \times 10^{-5}$  eV/K and  $T_m$  is the temperature (K) of TL glow curve peak.

## References

- 1 L. L. Zhang, S. Zhang, Z. D. Hao, X. Zhang, G. H. Pan, Y. S. Luo, H. J. Wu and J. H. Zhang, A high efficiency broad-band near-infrared  $\text{Ca}_2\text{LuZr}_2\text{Al}_3\text{O}_{12}:\text{Cr}^{3+}$  garnet phosphor for blue LED chips, *J. Mater. Chem. C*, 2018, **6**, 4967–4976.
- 2 L. P. Jiang, X. Jiang, J. H. Xie, T. Zheng, G. C. Lv and Y. J. Su, Structural induced tunable NIR luminescence of  $(\text{Y,Lu})_3(\text{Mg,Al})_2(\text{Al,Si})_3\text{O}_{12}:\text{Cr}^{3+}$  phosphors, *J. Lumin.*, 2022, **247**, 118911.
- 3 W. D. Nie, Y. Li, J. X. Zuo, Y. K. Kong, W. F. Zou, G. Chen, J. Q. Peng, F. Du, L. Han and X. Y. Ye,  $\text{Cr}^{3+}$ -activated  $\text{Na}_3\text{X}_2\text{Li}_3\text{F}_{12}$  (X = Al, Ga, or In) garnet phosphors with broadband NIR emission and high luminescence efficiency for potential biomedical application, *J. Mater. Chem. C*, 2021, **9**, 15230–15241.
- 4 C. Lee, Z. Bao, M.-H. Fang, T. Lesniewski, S. Mahlik, M. Grinberg, G. Leniec, S. M. Kaczmarek, M. G. Brik, Y.-T. Tsai, T.-L. Tsai and R.-S. Liu, Chromium (III)-doped fluoride phosphors with broadband infrared emission for light-emitting diodes, *Inorg. Chem.*, 2020, **59**, 376–385.
- 5 H. S. Zhang, J. Y. Zhong, X. L. Zhang, H. X. Yang, Z. F. Mu and W. R. Zhao, Achieving an ultra-broadband infrared emission through efficient energy transfer in  $\text{LiInP}_2\text{O}_7:\text{Cr}^{3+},\text{Yb}^{3+}$  phosphor, *J. Alloys Compd.*, 2022, **894**, 162386.
- 6 L. W. Zeng, J. Y. Zhong, C. J. Li, Z. Q. Zhuang, L. Chen and W. R. Zhao, Broadband near-infrared emission in the  $\text{NaInP}_2\text{O}_7:\text{Cr}^{3+}$  phosphor for light-emitting-diode applications, *J. Lumin.*, 2022, **247**, 118909.
- 7 Q. Y. Shao, H. Ding, L. Q. Yao, J. F. Xu, C. Liang, Z. H. Li, Y. Dong and J. Q. Jiang, Broadband near-infrared light source derived from  $\text{Cr}^{3+}$ -doped phosphors and a blue LED chip, *Opt. Lett.*, 2018, **43**, 5251–5254.
- 8 Q. Y. Shao, H. Ding, L. Q. Yao, J. F. Xu, C. Liang and J. Q. Jiang, Photoluminescence properties of a  $\text{ScBO}_3:\text{Cr}^{3+}$  phosphor and its applications for broadband near-infrared LEDs, *RSC Adv.*, 2018, **8**, 12035–12042.
- 9 H. Y. Wu, L. H. Jiang, K. Li, C. Y. Li and H. J. Zhang, Design of broadband near-infrared  $\text{Y}_{0.57}\text{La}_{0.72}\text{Sc}_{2.71}(\text{BO}_3)_4:\text{Cr}^{3+}$  phosphors based on one-site occupation and their application in NIR light-emitting diodes, *J. Mater. Chem. C*, 2021, **9**, 11761–11771.
- 10 Y. Zhang, Y. J. Liang, S. H. Miao, D. X. Chen, S. Yan and J. W. Liu, Broadband near-infrared  $\text{BaMSi}_3\text{O}_9:\text{Cr}^{3+}$  (M = Zr, Sn, Hf) phosphors for light-emitting diode applications, *Inorg. Chem. Front.*, 2021, **8**, 5186–5194.
- 11 D. J. Hou, H. H. Lin, Y. Zhang, J. Y. Li, H. L. Li, J. H. Dong, Z. X. Lin and R. Huang, A broadband near-infrared phosphor  $\text{BaZrGe}_3\text{O}_9:\text{Cr}^{3+}$ : luminescence and application for light-emitting diodes, *Inorg. Chem. Front.*, 2021, **8**, 2333–2340.
- 12 L. Q. Yao, Q. Y. Shao, M. L. Shi, T. Q. Shang, Y. Dong, C. Liang, J. H. He and J. Q. Jiang, Efficient ultra-broadband  $\text{Ga}_4\text{GeO}_8:\text{Cr}^{3+}$  phosphors with tunable peak wavelengths from 835 to 980 nm for NIR pc-LED application, *Adv. Opt. Mater.*, 2022, **10**, 2102229.
- 13 J. Tauc, R. Grigorovici and A. Vancu, Optical properties and electronic structure of amorphous germanium, *Phys. Status Solidi B*, 1966, **15**, 627–637.
- 14 E. Davis and N. F. Mott, Conduction in non-crystalline systems V. Conductivity, optical absorption and photoconductivity in amorphous semiconductors, *Philos. Mag.*, 1970, **22**, 0903–0922.
- 15 N. Yamashita, Luminescence centers of  $\text{Ca}(\text{S:Se})$  phosphors activated with impurity ions having  $s^2$  configuration. I.  $\text{Ca}(\text{S:Se}):\text{Sb}^{3+}$  phosphors, *J. Phys. Soc. Jpn.*, 1973, **35**, 1089–1097.
- 16 B. Henderson and G. F. Imbusch, *Optical Spectroscopy of Inorganic Solids*, Oxford University Press, 1989.
- 17 M. Zhao, S. Q. Liu, H. Cai, F. Y. Zhao, Z. Song and Q. L. Liu, Efficient broadband near-infrared phosphor  $\text{Sr}_2\text{ScSbO}_6:\text{Cr}^{3+}$  for solar-like lighting, *Sci. China Mater.*, 2022, **65**, 748–756.
- 18 S. Y. Zhang, F. Y. Zhao, S. Q. Liu, Z. Song and Q. L. Liu, An improved method to evaluate trap depth from thermoluminescence, *J. Rare Earths*, 2024, Doi: 10.1016/j.jre.2024.02.004.
